# Supplementary material
Source: PubMed Central journal article supplement (PMC2841477)
Supplement: NIHMS166711-supplement-1-10.pdf [file NIHMS166711-supplement-1-10.pdf]

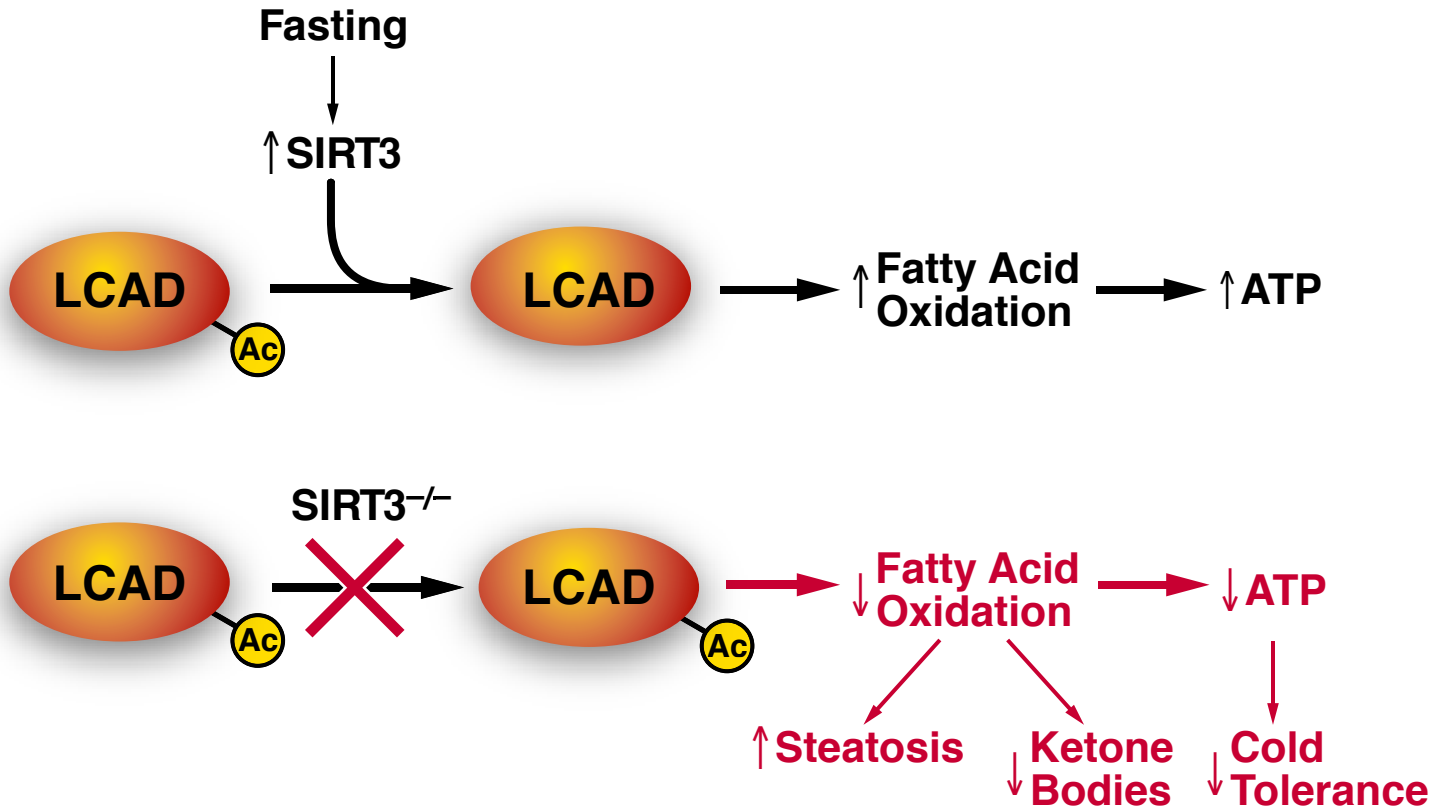

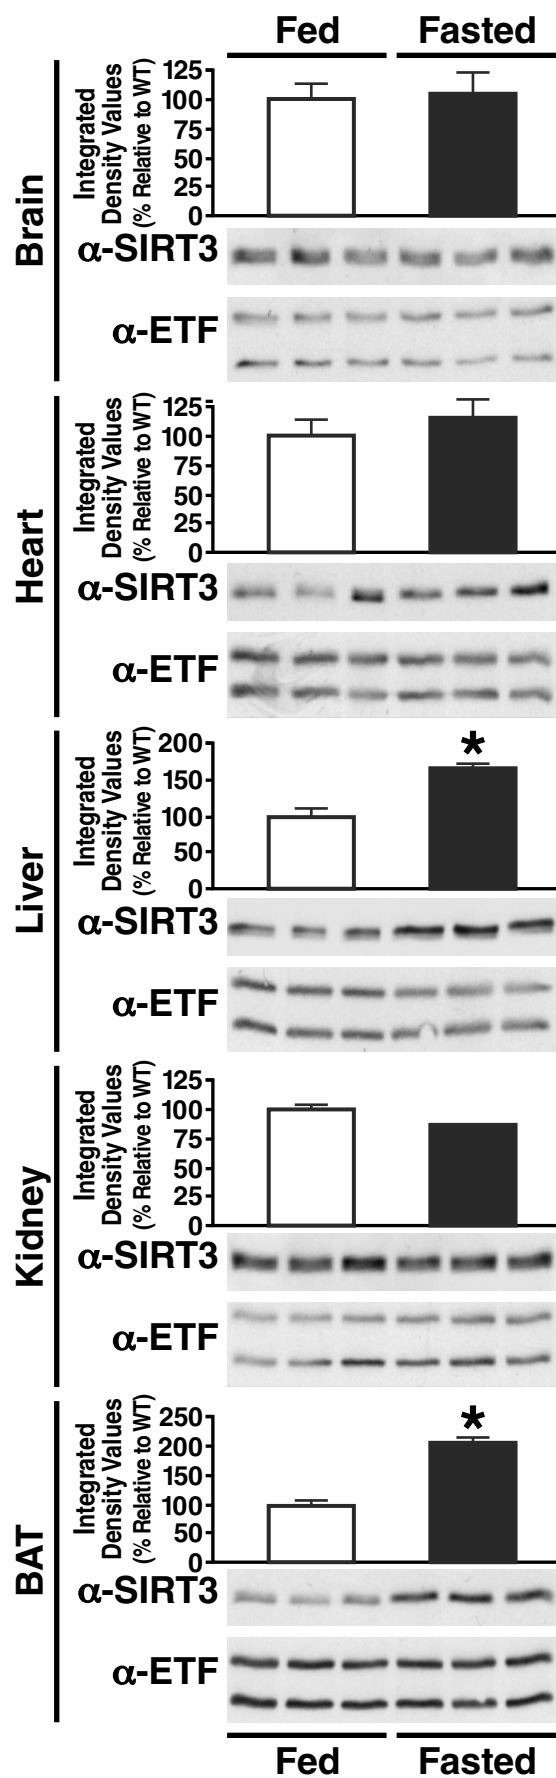

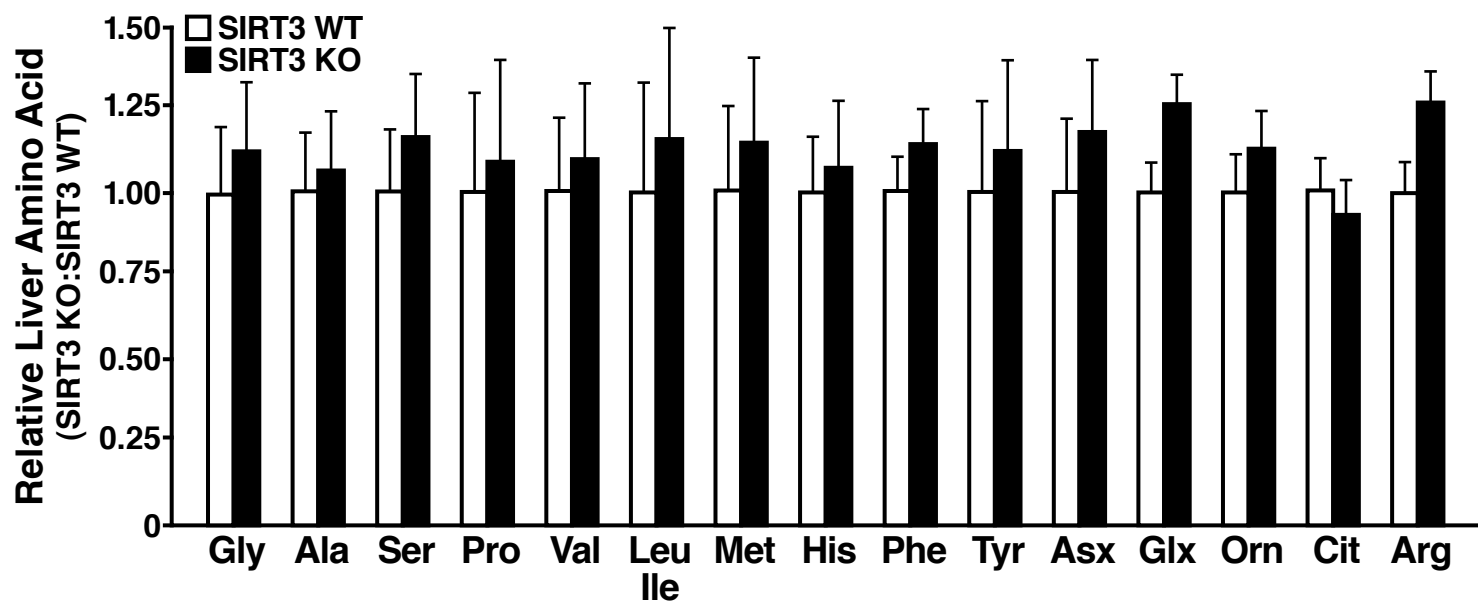

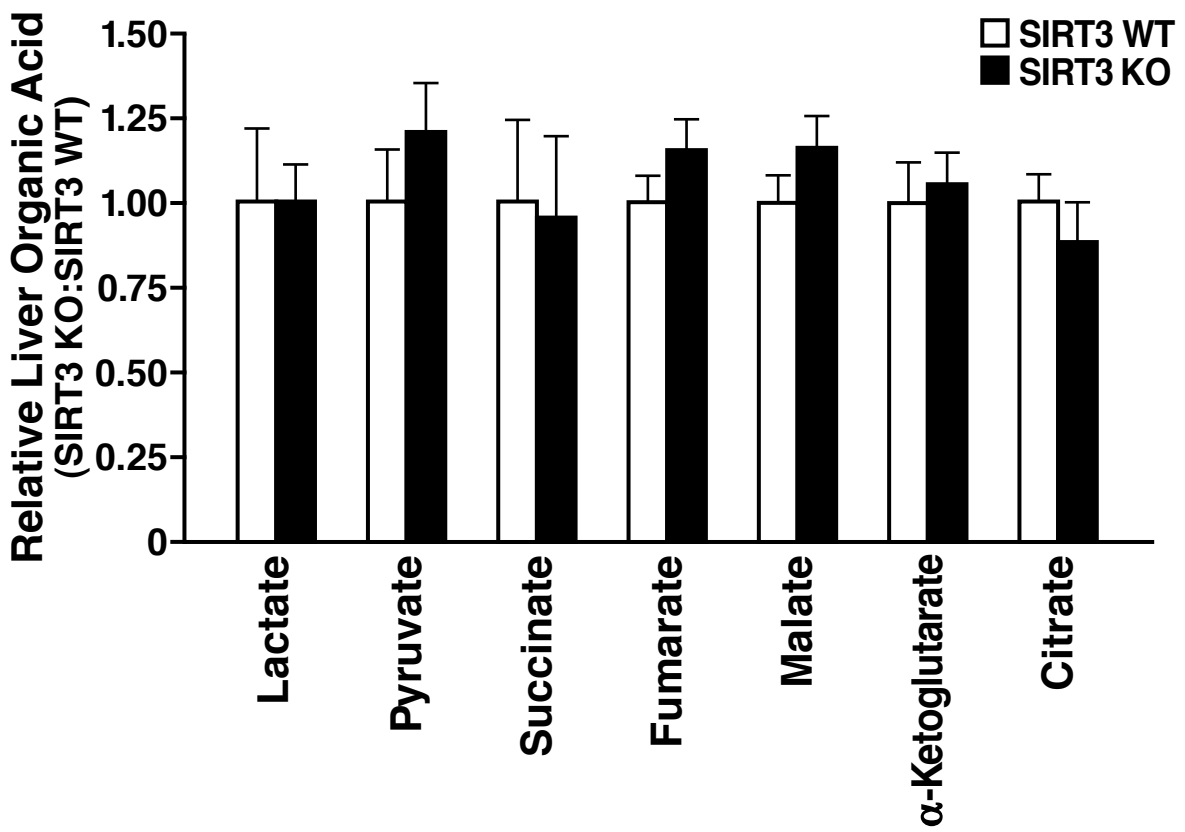

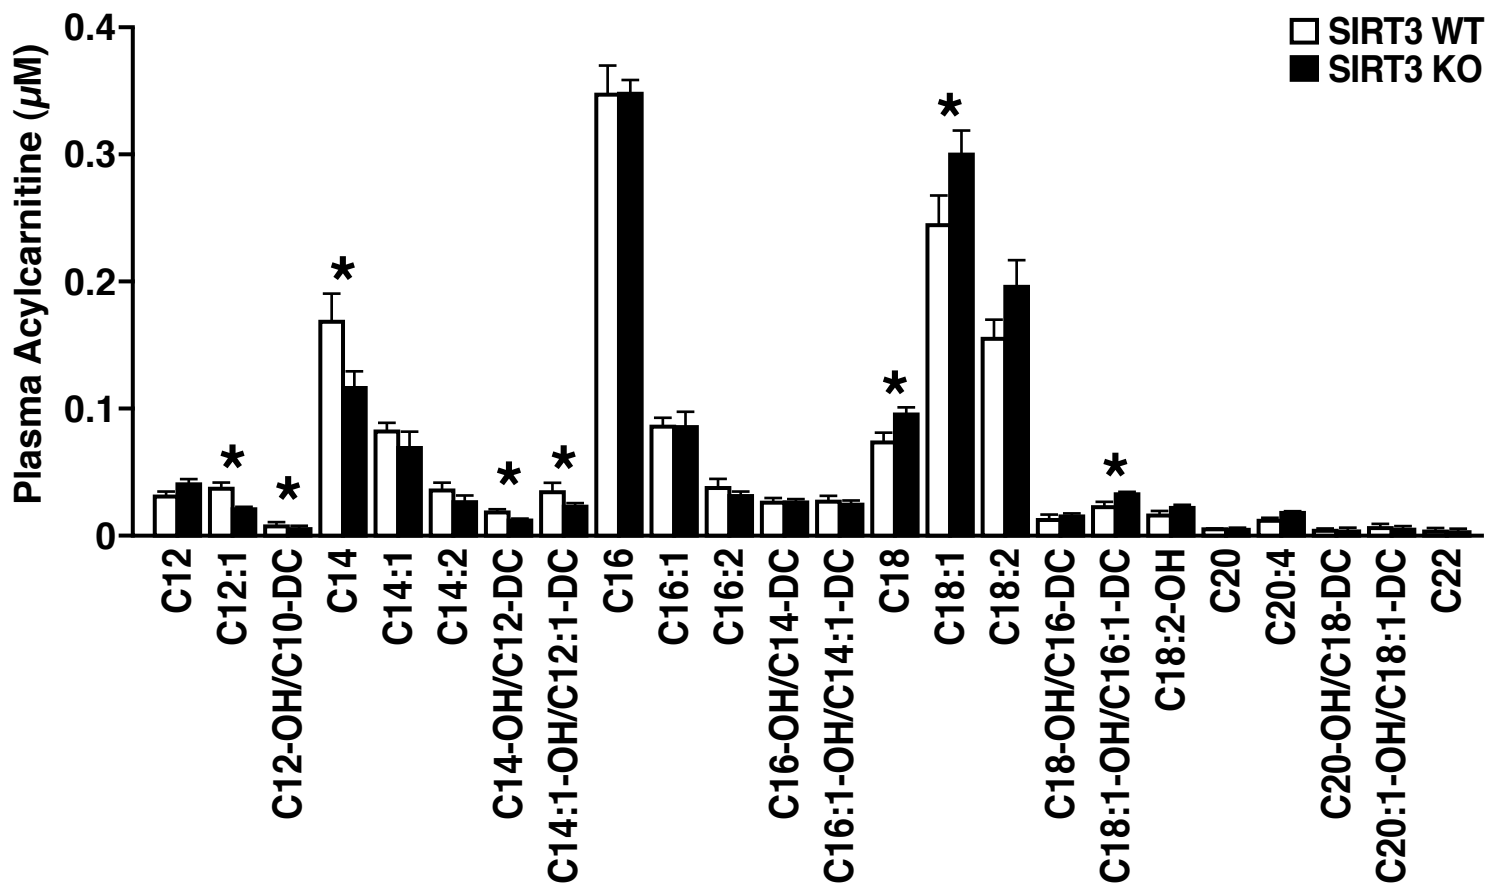

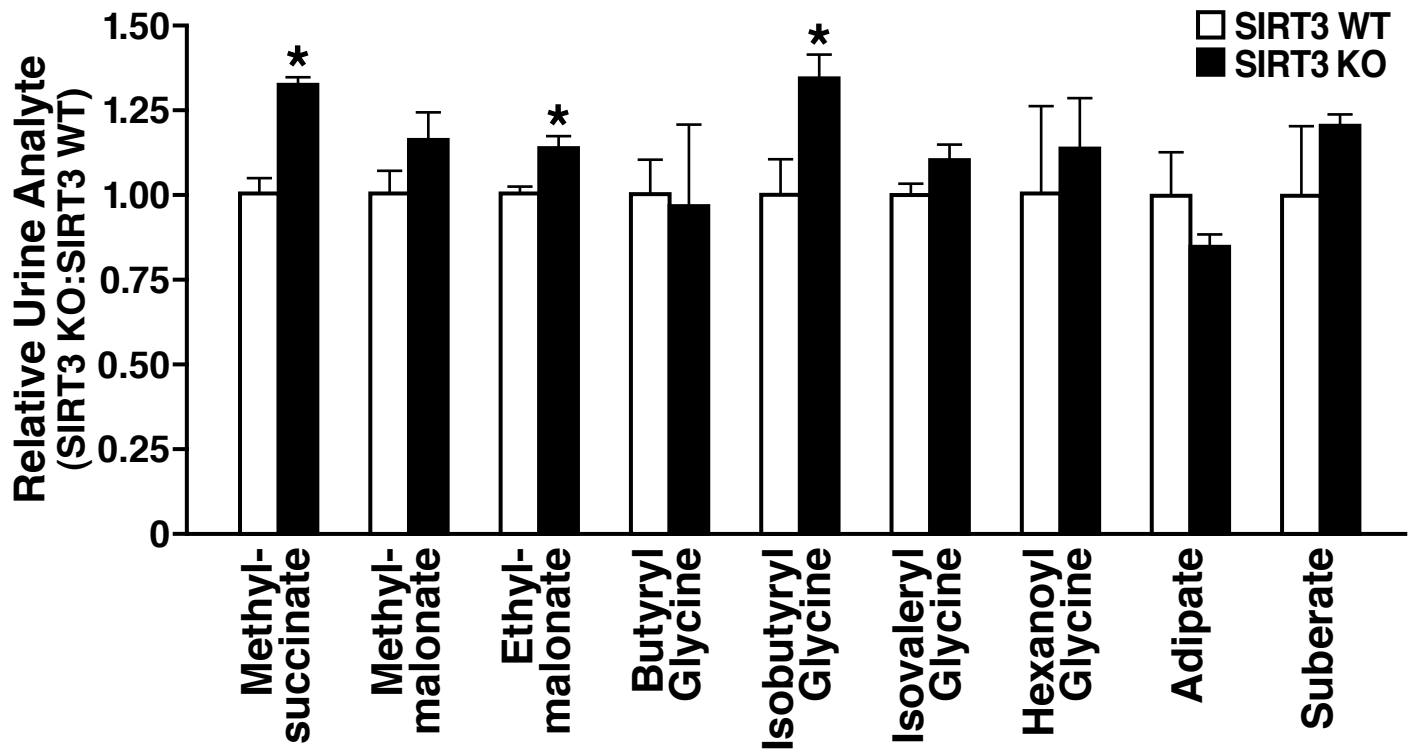

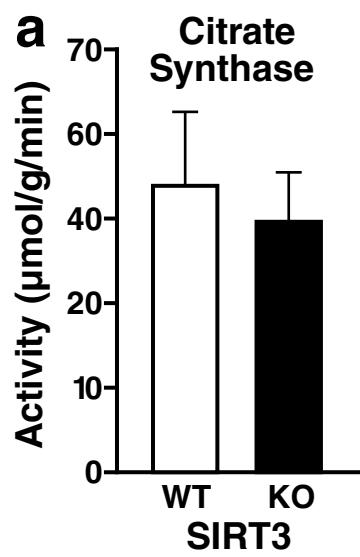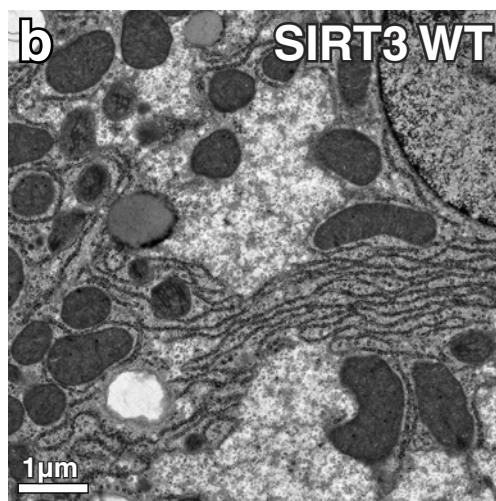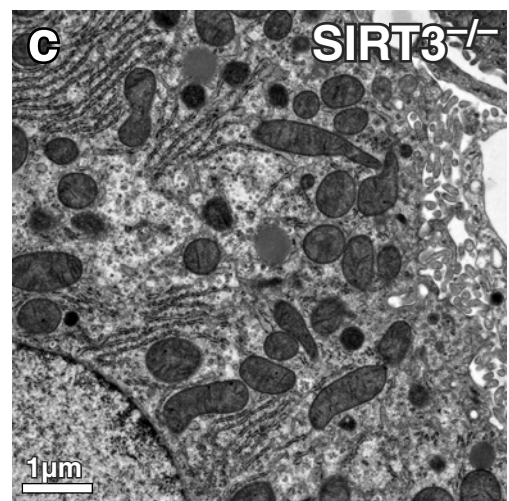

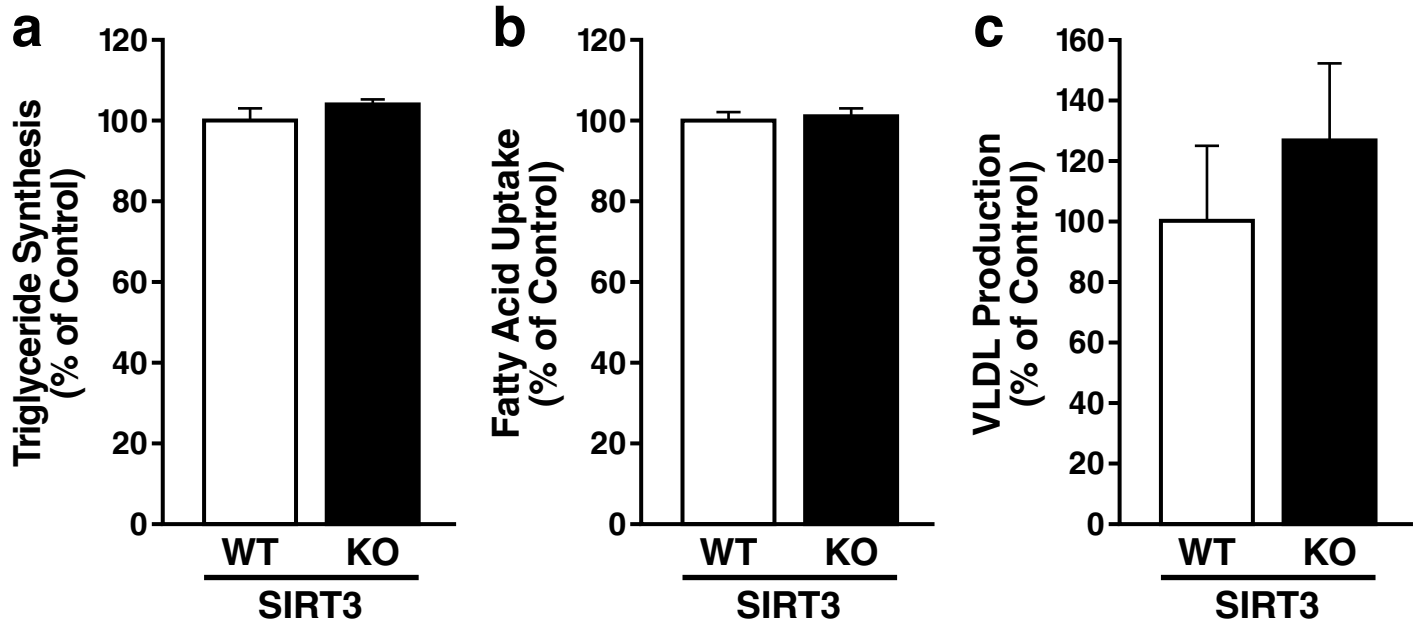



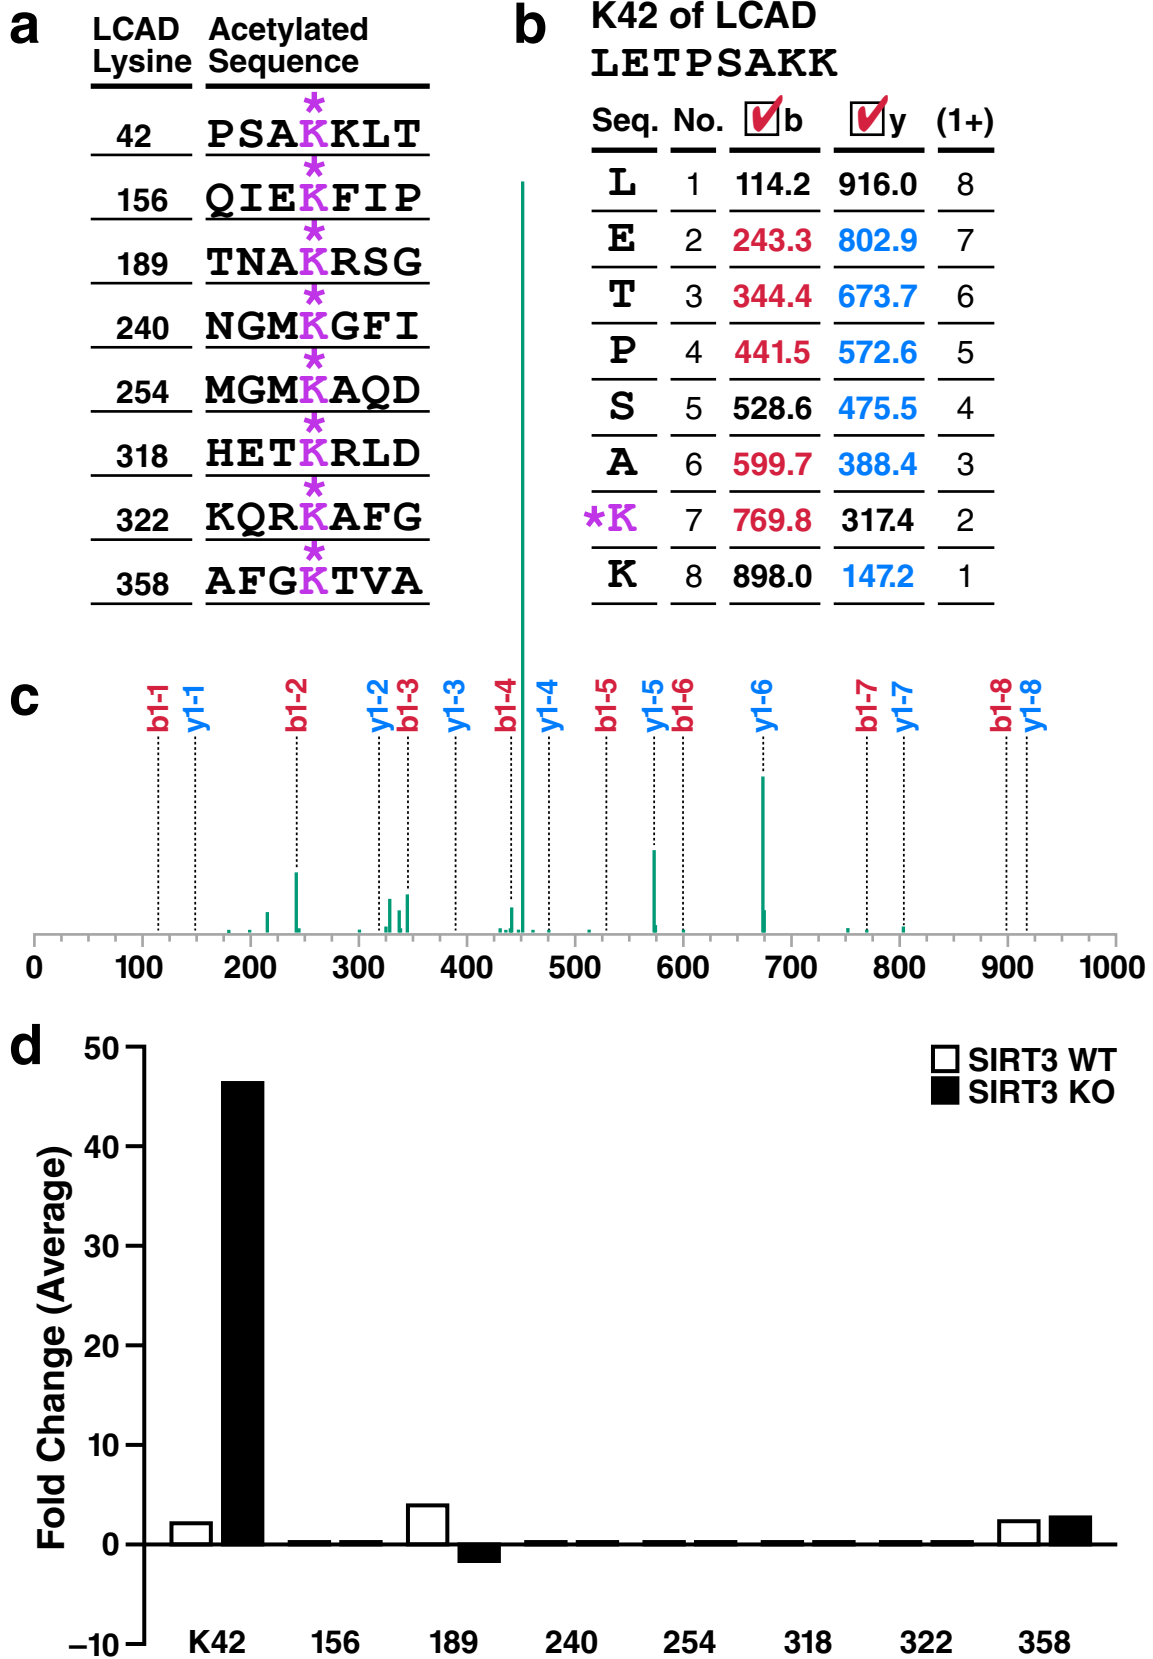

Hirschey et al, Supplementary Figure 10

**A**

|       |                              |                                |                        |         |     |
|-------|------------------------------|--------------------------------|------------------------|---------|-----|
| hLCAD | MAARLL-RGSLRVLGGHRAPRQLPAARC | SHSGGEEERLETPSAKKLT            | DIGIRRI                | FSPEHDI | 59  |
| mLCAD | MAARLLLR-SLRVLKARSAPRPPPSARC | SHSGAEARLETPSAKKLT             | DVGI                   | RRI     | 59  |
| hLCAD | FRKSVRKFQEEVIPHSEWEKAGEVSRE  | VWEKAGKQGLL                    | GVNIAE-HLGGIG          | GDLYSAA | 118 |
| mLCAD | FRESVRKFQEEVIPHTEWEKAGEVSRE  | VWEKAGKQGLL                    | GINIAEKH-GGIG          | DLLSTA  | 118 |
| hLCAD | IVWEEQAYSNCSPGFSIHSGIVMSYIT  | NHGSEEQIKHFIPQMTAGKCIGAIAMTE   | PGAG                   |         | 178 |
| mLCAD | VTWEEQAYSNCTGPGFSLHSDIVMPYI  | ANYGTKEQIEKFIPQMTAGKCIGAIAMTE  | PGAG                   |         | 178 |
| hLCAD | SDLQGIKTNNAKDGSDWILNGSKVFI   | SNGSLSDVVIVAVTNHEAPSPA         | HGISLFLVENG            |         | 238 |
| mLCAD | SDLQGVRTNAKRSGSDWILNGSKVFI   | TNGWLSDLVIVAVTNREARSPA         | HGISLFLVENG            |         | 238 |
| hLCAD | MKGFIKGRKLHKMGLKAQDTAELFFED  | IRLPASALLGEENKGFYIMKELPQERLLI  | ADV                    |         | 298 |
| mLCAD | MKGFIKGRKLHKMGKAQDTAELFFED   | VRLPANALLGEENKGFYILMQELPQERLLI | AEL                    |         | 298 |
| hLCAD | AISASEFMFEETRN               | VYKQKAFGKTVAHLQTVQHKLAE        | LKTHICVTRAFVDNCLQLHEAK |         | 358 |
| mLCAD | AISACEFMFEETRN               | VYKQKAFGKTVAHIQTVQHKLAE        | LKTHICVTRAFVDSCLQLHETK |         | 358 |
| hLCAD | RLDSATACMAKYWASELQNSVAYDCV   | QLHGGWGYMWEYPIAKAYVDARVQPI     | YGGTNEIM               |         | 418 |
| mLCAD | RLDSGSASMAKYWASELQNSVAYECV   | QLHGGWGYMWEYPIAKAYVDARVQPI     | YGGTNEIM               |         | 418 |
| hLCAD | KELIAREIVFD                  |                                |                        | 429     |     |
| mLCAD | KELIARQIVSD                  |                                |                        | 429     |     |

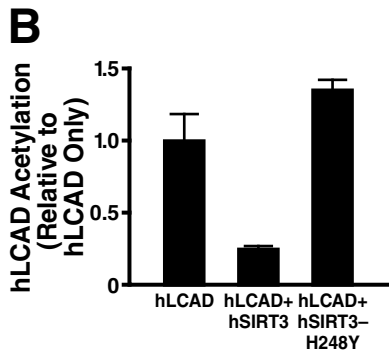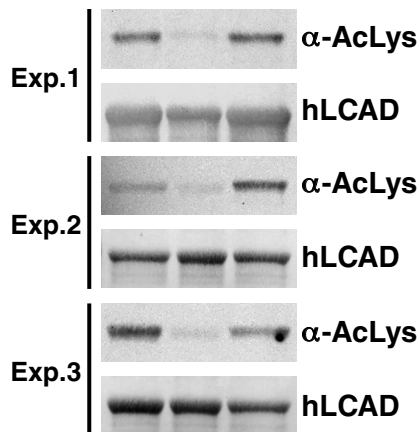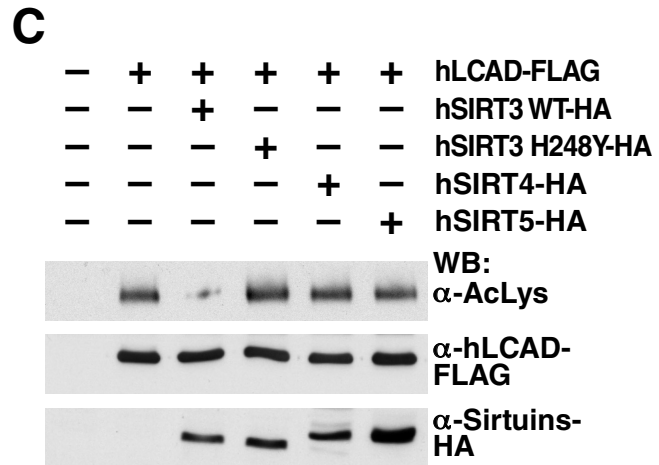

Hirschey *et al*, Supplementary Table 1

|                             | <b>Fed</b>  |             | <b>Fasted</b> |              |
|-----------------------------|-------------|-------------|---------------|--------------|
| <b>SIRT3:</b>               | <b>WT</b>   | <b>KO</b>   | <b>WT</b>     | <b>KO</b>    |
| <b>Glucose (mg/dL)</b>      | <b>297</b>  | <b>264</b>  | <b>102</b>    | <b>103</b>   |
| <b>Free Fatty Acid (mM)</b> | <b>0.37</b> | <b>0.32</b> | <b>1.23</b>   | <b>1.14</b>  |
| <b>Ketone Bodies (mM)</b>   | <b>0.21</b> | <b>0.18</b> | <b>1.58</b>   | <b>1.32*</b> |

## Supplementary Figure Legends

**Figure S1. Working model.** The increase in SIRT3 protein during fasting decreases the acetylation of LCAD, an important fatty acid oxidation (FAO) enzyme, resulting in increased FAO flux and energy production. In SIRT3<sup>-/-</sup> mice, LCAD remains hyperacetylated, resulting in reduced FAO that causes steatosis, reduced ketone body production, and reduced ATP generation resulting in cold intolerance.

**Figure S2. Fasting induces SIRT3 expression in oxidative tissues.**

Mitochondria isolated from tissues of fed or fasted (~24 h) wild-type mice were analyzed by western blotting analysis with an antiserum specific for SIRT3, electron transfer flavoprotein (ETF) was used as a reference, integrated density values were calculated for fed and fasted wild-type mice.

**Figure S3. SIRT3<sup>-/-</sup> and wt mice show no differences in metabolomic profiling of hepatic amino acids.**

Metabolomic analysis was conducted on mouse liver tissue, and data obtained in SIRT3<sup>-/-</sup> mice are shown relative to wt mice ( $n=5$ /genotype, fasted 24 h).

**Figure S4. SIRT3<sup>-/-</sup> and wt mice show no differences in metabolomic profiling of hepatic organic acids.**

Metabolomic analysis was conducted on mouse liver tissue, and data obtained in SIRT3<sup>-/-</sup> mice are shown relative to wt mice ( $n=5$ /genotype, fasted 24 h).

**Figure S5. Abnormal accumulation of long-chain acylcarnitines in the livers of mice lacking SIRT3 during fasting.**

Metabolomic analysis was conducted on mouse liver tissue, and data obtained in wt and SIRT3<sup>-/-</sup> mice are given in absolute values; data correspond to relative values in Figure 2b ( $n=5$ /genotype, fasted 24 h), \* $p<0.05$ .

**Figure S6. Abnormal excretion of urine analytes in mice lacking SIRT3 during**

**fasting.**

Metabolomic analysis was conducted on mouse urine, and data obtained in SIRT3<sup>-/-</sup> mice are shown relative to wt mice ( $n=5/\text{genotype}$ , fasted 24 h),  $p<0.05$ .

**Figure S7. SIRT3<sup>-/-</sup> and wt mice show no differences in hepatic citrate synthase activity, and electron micrographs are similar.**

**a.** Citrate synthase enzyme activity was measured in mouse liver tissue *ex vivo* ( $n=10/\text{genotype}$  from two separate trials, fasted 24 h),  $p=\text{NS}$ ; **b, c.** Transmission electron micrograph images from wt (panel b) and SIRT3<sup>-/-</sup> (panel c) liver tissue.

**Figure S8. Rates of lipogenesis, lipid uptake and lipid export are similar in wt and SIRT3<sup>-/-</sup> mice.**

**a.** Radiolabeled <sup>14</sup>C-oleic acid triglyceride synthesis was measured in wt and SIRT3<sup>-/-</sup> mouse primary hepatocytes (two independent hepatocyte preparations,  $n=5$  measurements/sample). **b.** Radiolabeled <sup>14</sup>C-oleic acid lipid uptake was measured in wt and SIRT3<sup>-/-</sup> mouse primary hepatocytes (two independent hepatocyte preparations,  $n=5$  measurements/sample). **c.** VLDL lipid export was measured in wt and SIRT3<sup>-/-</sup> mice ( $n=6/\text{genotype}$ , fasted 5 h),  $p=\text{NS}$

**Figure S9. Mass spectrometry analysis identified eight sites of LCAD acetylation, and LCAD lysine 42 is hyperacetylated in SIRT3<sup>-/-</sup> mice.**

**a.** Summary peptide fragment table from acetylated lysine residues; **b, c.** Representative  $m/z$  spectra (K42) obtained from mass spectrometry analyses of LCAD from purified mouse liver mitochondria in wt and SIRT3<sup>-/-</sup> mice; **d.** Differential acetylation fold values for LCAD acetylated lysines from wt and SIRT3<sup>-/-</sup> hepatic mouse mitochondria.

**Figure S10. SIRT3 deacetylates human LCAD *in vitro* and *in vivo*.**

**a.** Protein sequence alignment between hLCAD (top) and mLCAD (bottom); **b.** Purified recombinant hLCAD expressed in *E. coli* was incubated *in vitro* with recombinant hSIRT3 or hSIRT3-H248Y (catalytically-inactive SIRT3 mutant); **c.** Expression vectors for wt hSIRT3, hSIRT3-H248Y (catalytically-inactive SIRT3 mutant), hSIRT4, or

hSIRT5 were co-transfected into HEK293 cells with expression vectors for FLAG-tagged hLCAD, and the level of acetylation of hLCAD was assessed after anti-FLAG immunoprecipitation followed by western blotting using an anti-acetylysine antiserum.

**Table S1. Metabolic parameters were measured and recorded in wt and SIRT3<sup>-/-</sup> mice under fed and fasted conditions.**
